# Supplementary material for: New Isolated Metschnikowia pulcherrima Strains from Apples for Postharvest Biocontrol of Penicillium expansum and Patulin Accumulation
Source: MDPI journal article supplement (doi:10.3390/toxins13060397), 2021-06-02
Supplement: s1 [file s1]

## Supplementary Materials: New Isolated *Metschnikowia pulcherrima* Strains from Apples for Postharvest Biocontrol of *Penicillium expansum* and Patulin Accumulation

Laura Settler-Ramírez, Gracia López-Carballo, Pilar Hernández-Muñoz, Angélique Fontana, Caro-line Strub and Sabine Schorr-Galindo

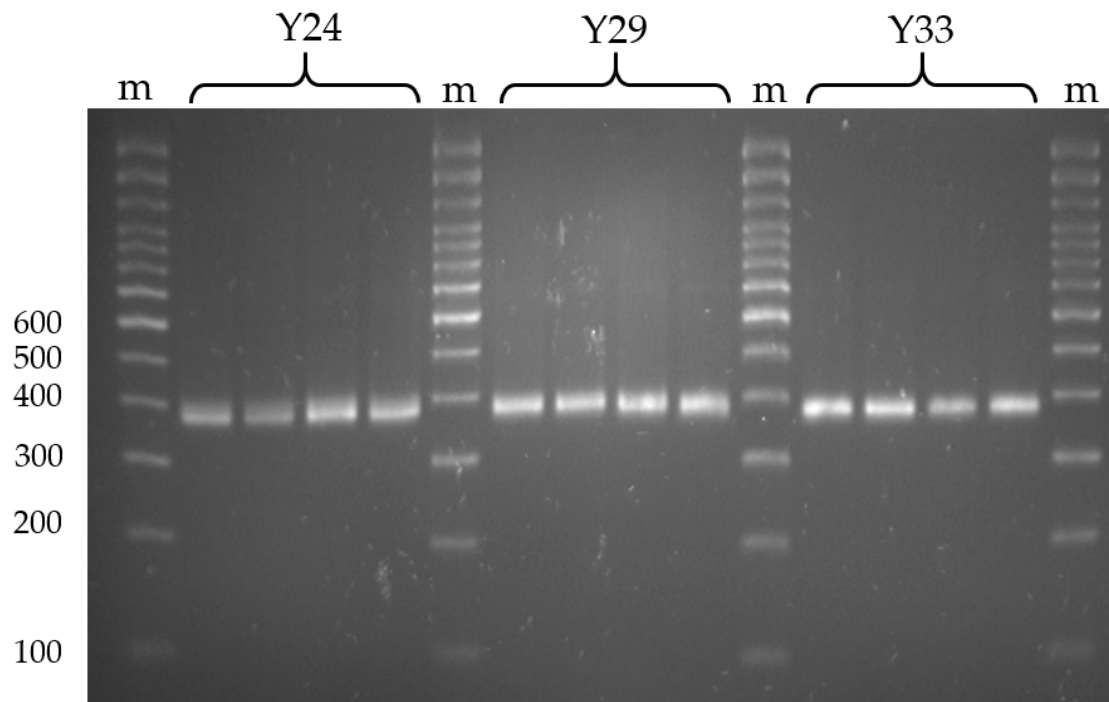

**Figure S1.** PCR fragment of 5.8S genes (ITS region) of isolated yeasts. Lanes m correspond to 100 bp DNA ladder.
